# Supplementary material for: Physical insights into protection effect of conjugated polymers by natural antioxidants
Source: Royal Society of Chemistry journal article supplement (doi:10.1039/d0ra09657a), 2021-01-01
Supplement: d0ra09657a1.pdf [file d0ra09657a1.pdf]

1 Supporting Information for

2

3 **Physical insights into protection effect of conjugated polymers by**  
4 **natural antioxidants†**

5

6 Mingcai Xie, Yan Hua, Daocheng Hong, Sushu Wan, Yuxi Tian\*

7

8 Key Laboratory of Mesoscopic Chemistry of MOE, School of Chemistry and  
9 Chemical Engineering and Jiangsu Key Laboratory of Vehicle Emissions Control,  
10 Nanjing University, Nanjing, China. E-mail address: tyx@nju.edu.cn

11

12

13

14

15

16

17

18

19

20

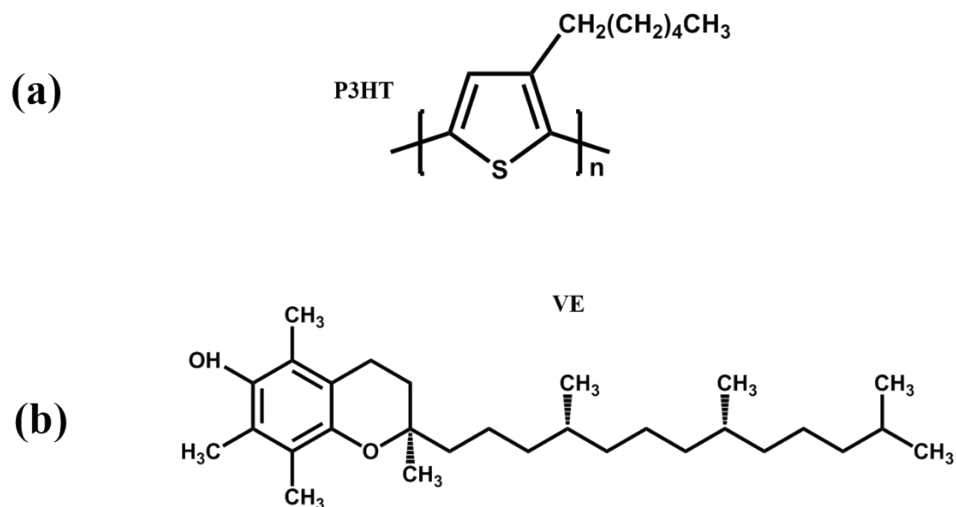

Fig. S1. Chemical structure of (a) P3HT and (b) VE.

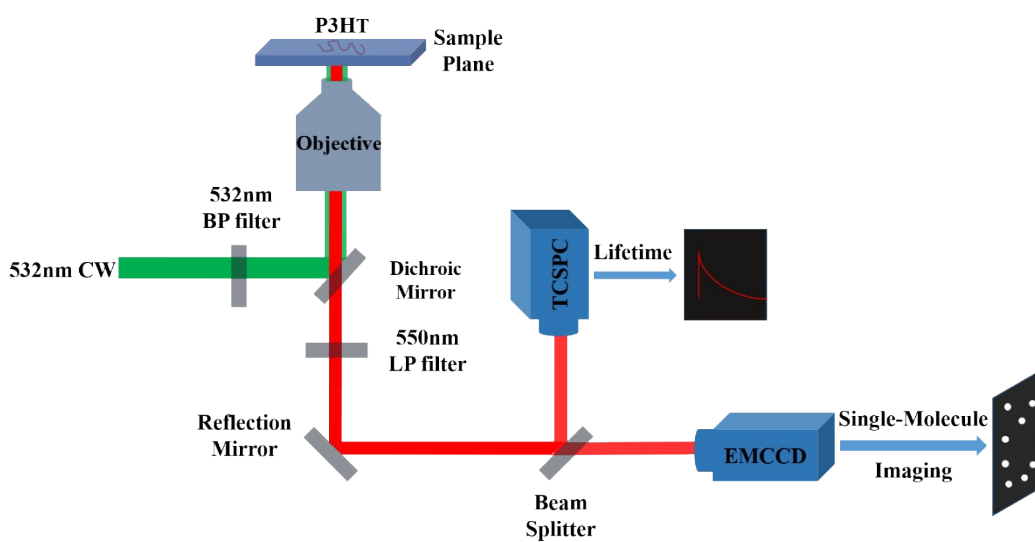

Fig. S2. Experimental setup of a home-built wide-field fluorescence microscope.

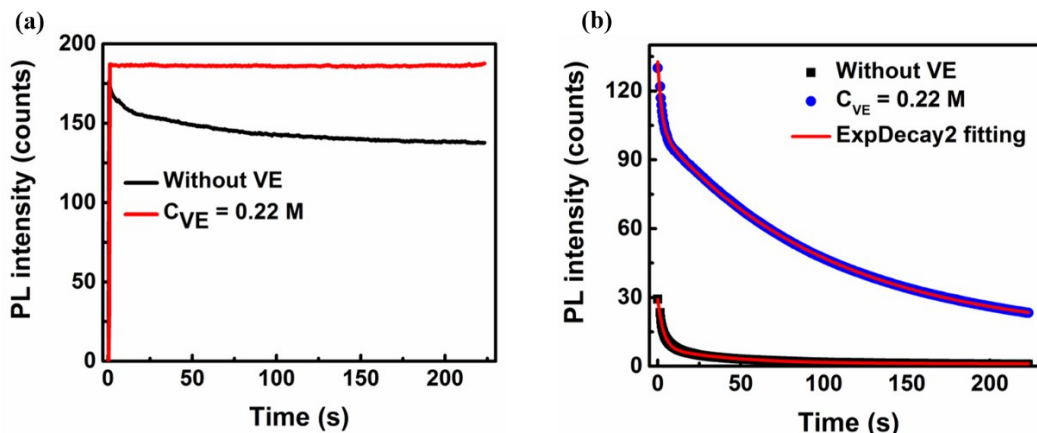

27

28 **Fig. S3.** (a) The raw fluorescence intensity traces of P3HT in solution with and without addition  
 29 of VE. (b) The raw fluorescence intensity traces of P3HT in solid films with (blue solid circles)  
 30 and without (black solid square) addition of VE. The red solid lines are the fitting curves of the  
 31 fluorescence decay using a bi-exponential function. The power density of the excitation light of  
 32 the 532 nm laser was 3.11 and 4.30 W/cm<sup>2</sup> for P3HT in solutions and in films, respectively. The  
 33 exposure time was 0.3 s.

34

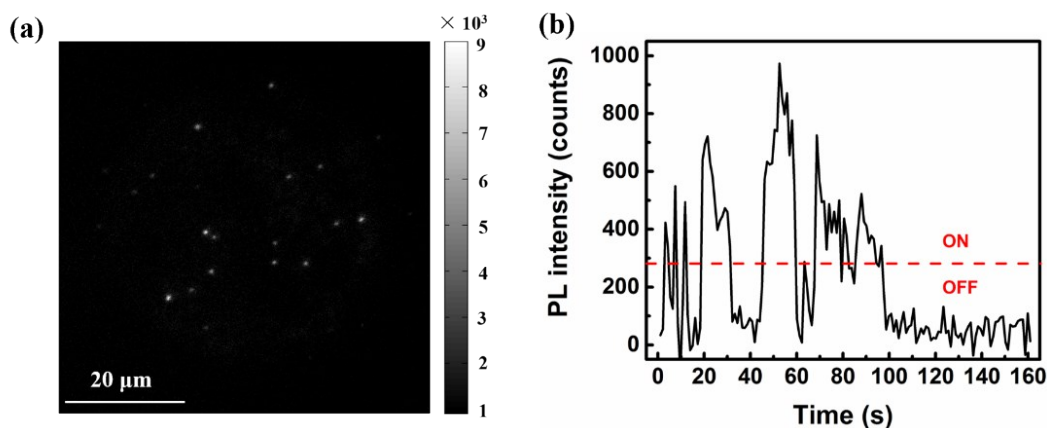

35

36 **Fig. S4.** (a) The typical single-molecule fluorescence image and (b) intensity trace of P3HT with  
 37 addition of  $C_{VE} = 0.22$  M under continuous light irradiation for 160 s. The 532 nm laser with power  
 38 density of 7.23 W/cm<sup>2</sup> was used as excitation source and the exposure time was 1 s.

39

40 As shown in Fig. S5, we detailedly provided the calculation methods of the on-time duration,  
 41 off-time duration, total on-time duration and total off-time duration. Fig. S5a was the schematic  
 42 diagram of single-molecule fluorescence intensity traces with significant blinking of two-state

43 level. The number labelled on the blinking stages represented on-state or off-state time duration.  
 44 We can easily count the present frequency of different on/off-time duration in the blinking stages.  
 45 For example, we obtained 11 times for the on-time duration of 3s by simple counting. Similarly,  
 46 we calculated different on-time and off-time duration histograms as shown in Fig. S5b and S5c,  
 47 respectively. In addition, we calculate the staying time of a molecule in the fluorescent state and  
 48 dark state to investigate the photobleaching property for a molecule under continuous light  
 49 excitation. As indicated in Fig. S5d, we use the total on-time and total off-time duration to  
 50 characterize the staying time of a molecule in the fluorescent state and dark state by summing up  
 51 on-time and off-time duration from single-molecule fluorescence intensity traces in Fig. S5a,  
 52 respectively.  
 53

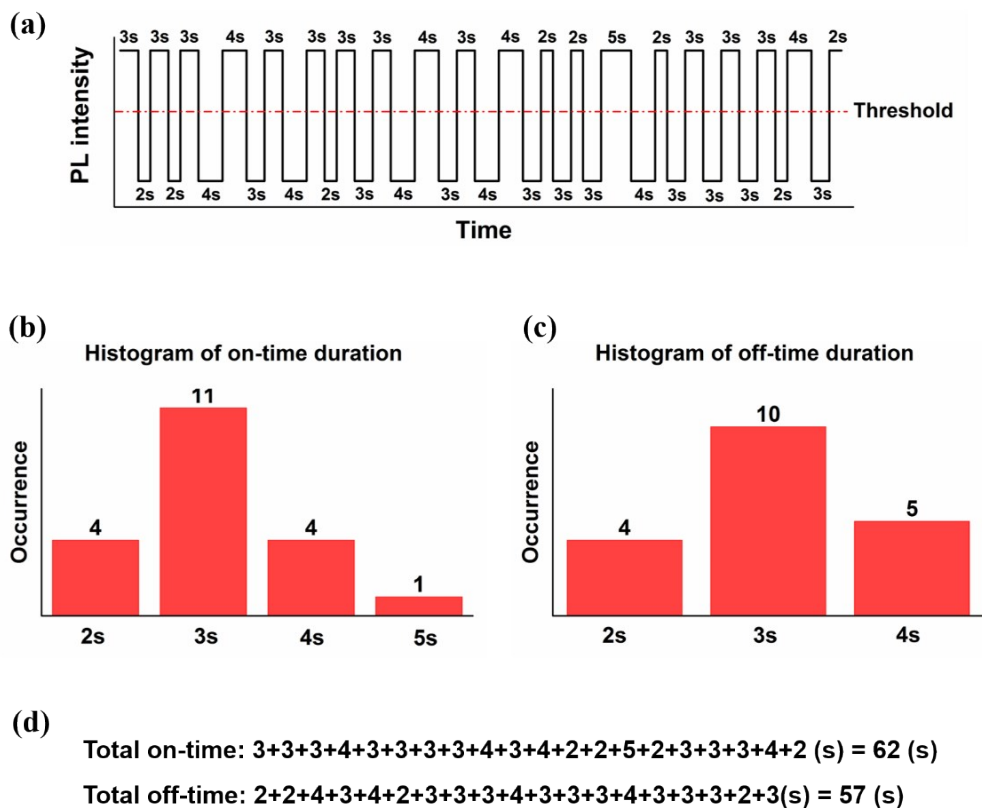

54  
 55 **Fig. S5.** The schematic illustration for statistic and calculation. (a) The fluorescence intensity  
 56 traces in individual molecules. (b) On-time duration calculation. (c) Off-time duration calculation.  
 57 (d) Total on-time and off-time duration calculation.
